# Supplementary material for: Preparation of ruthenium electrode materials and their application to the bactericidal properties of acidic electrolyzed oxidizing water
Source: Royal Society of Chemistry journal article supplement (doi:10.1039/d5ra01122a), 2025-01-01
Supplement: d5ra01122a1.pdf [file d5ra01122a1.pdf]

## Preparation of ruthenium electrode materials and the application to bactericidal properties of acidic electrolyzed oxidizing water

Yanxue Li,<sup>a</sup> Wei Zong,<sup>a</sup> Hao Zhang,<sup>\* a</sup> Dawei Lou,<sup>\* a</sup>

<sup>a</sup> College of Chemical and Pharmaceutical Engineering, Jilin Institute of Chemical Technology, Jilin 132022, People's Republic of China. Email: [dwlou@hotmail.com](mailto:dwlou@hotmail.com); Tel: +86-432-62185559; [zhangh\\_0915@126.com](mailto:zhangh_0915@126.com)

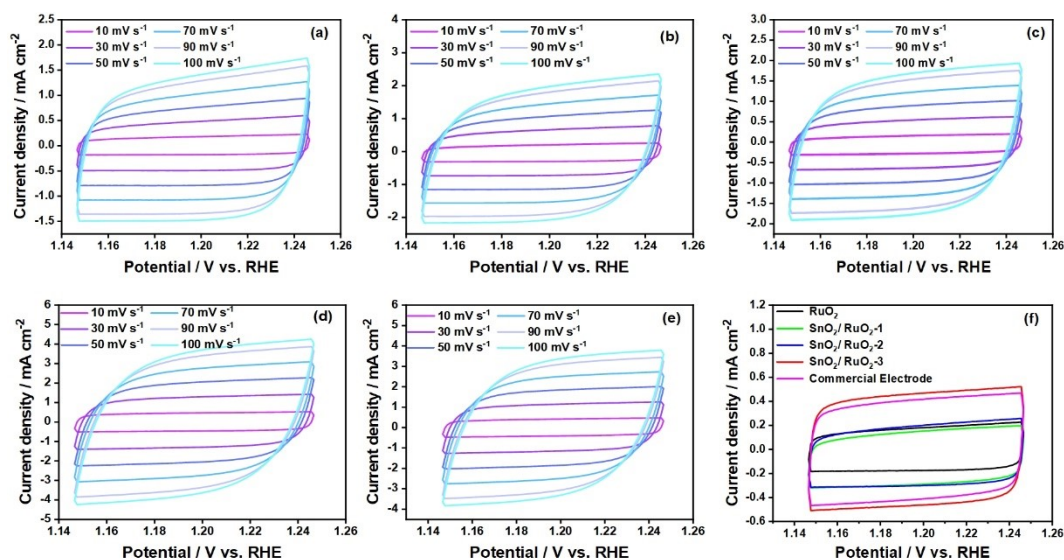

**Figure S1** The cyclic voltammograms of RuO<sub>2</sub> (a), SnO<sub>2</sub>/RuO<sub>2</sub>-(1,2,3) (b-d) , and commercial electrodes (e) with different scan rates (10, 30, 50, 70, 90, and 100 mV s<sup>-1</sup>). (f) the cyclic voltammograms of sweep rate of 10 mV s<sup>-1</sup> with different electrodes.

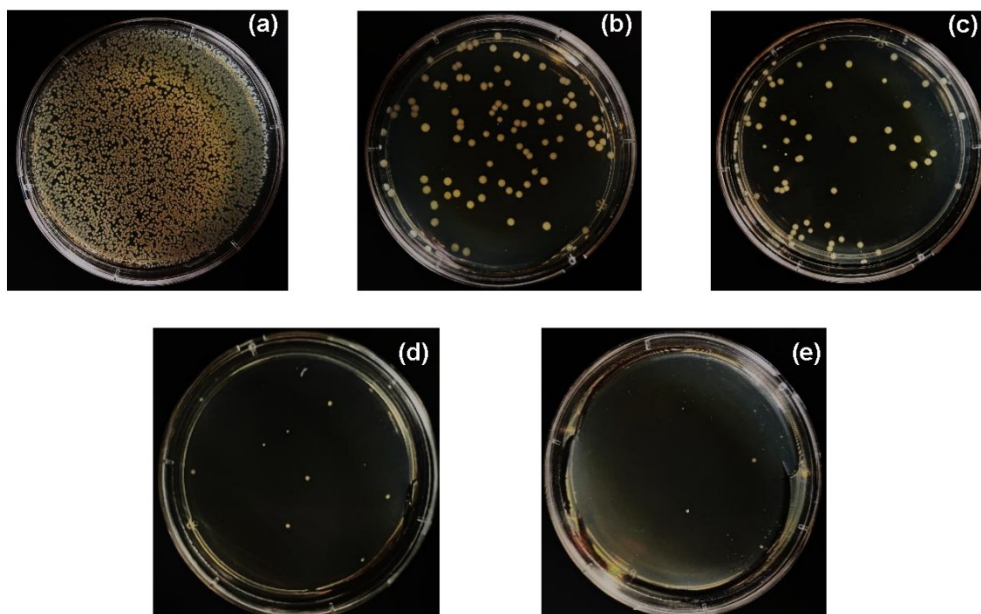

**Figure S2** Comparison of the effect of different sterilization times.
